# Supplementary material for: Probing kinetic and mechanistic features of bulk azide–alkyne cycloaddition
Source: Royal Society of Chemistry journal article supplement (doi:10.1039/d3cp00708a), 2023-01-01
Supplement: d3cp00708a1.pdf [file d3cp00708a1.pdf]

**Probing kinetic and mechanistic features of bulk azide-alkyne cycloaddition**

*Andrey Galukhin,<sup>1\*</sup> Roman Aleshin,<sup>1</sup> Roman Nosov,<sup>1</sup> Sergey Vyazovkin<sup>2\*</sup>*

<sup>1</sup>Alexander Butlerov Institute of Chemistry, Kazan Federal University, 18 Kremlevskaya Street, 420008 Kazan, Russian Federation

<sup>2</sup>Department of Chemistry, University of Alabama at Birmingham, 901 S. 14<sup>th</sup> Street, Birmingham, AL 35294, USA

E-mail: [and\\_galuhin@mail.ru](mailto:and_galuhin@mail.ru), [vyazovkin@uab.edu](mailto:vyazovkin@uab.edu)

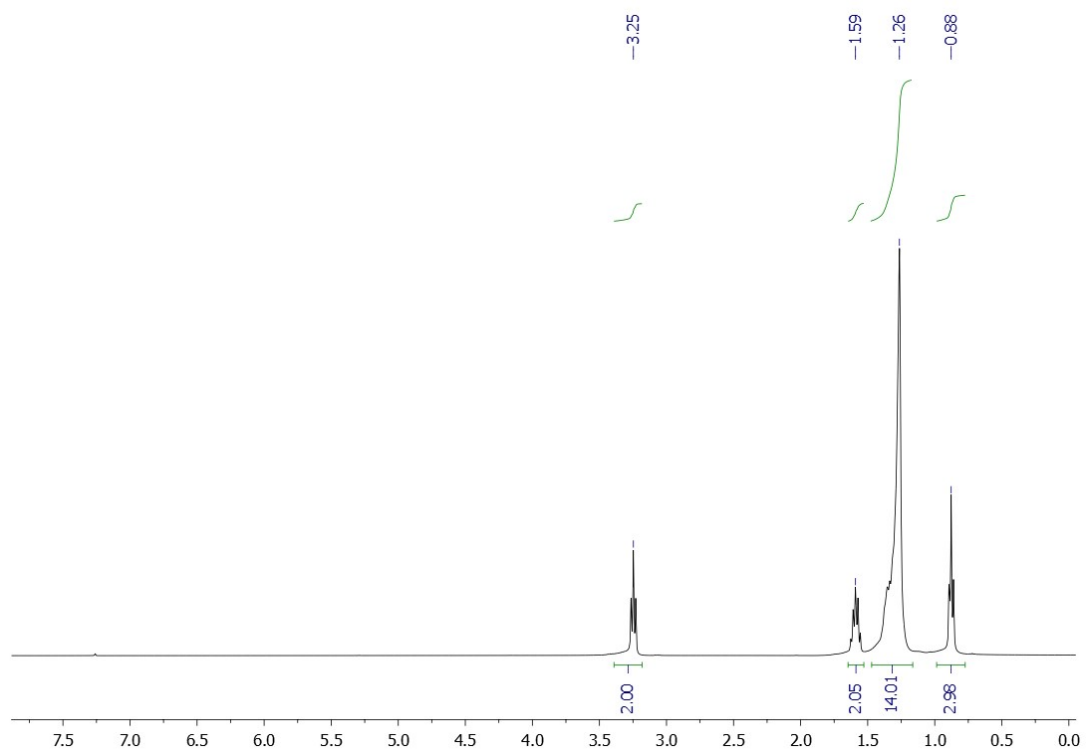

**Figure S1.**  $^1\text{H}$  NMR spectrum of 1-azidodecane ( $\text{CDCl}_3\text{-d}_1$ , 25  $^\circ\text{C}$ ).

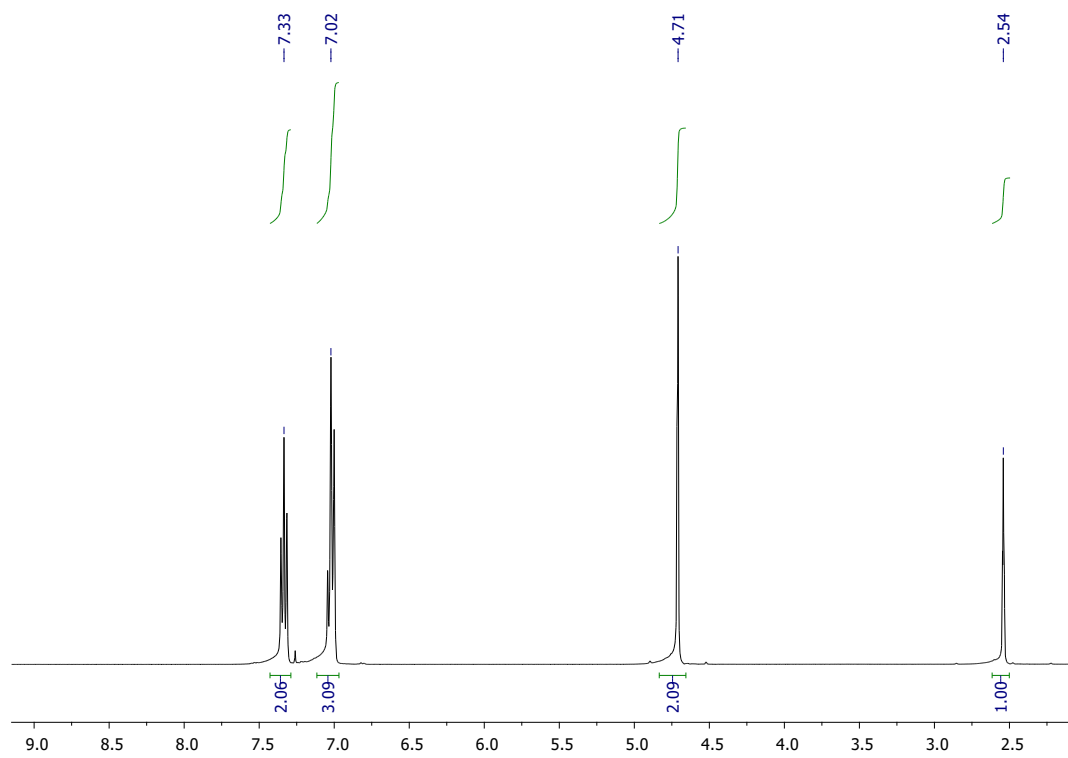

**Figure S2.**  $^1\text{H}$  NMR spectrum of phenyl propargyl ether ( $\text{CDCl}_3\text{-d}_1$ , 25  $^\circ\text{C}$ ).

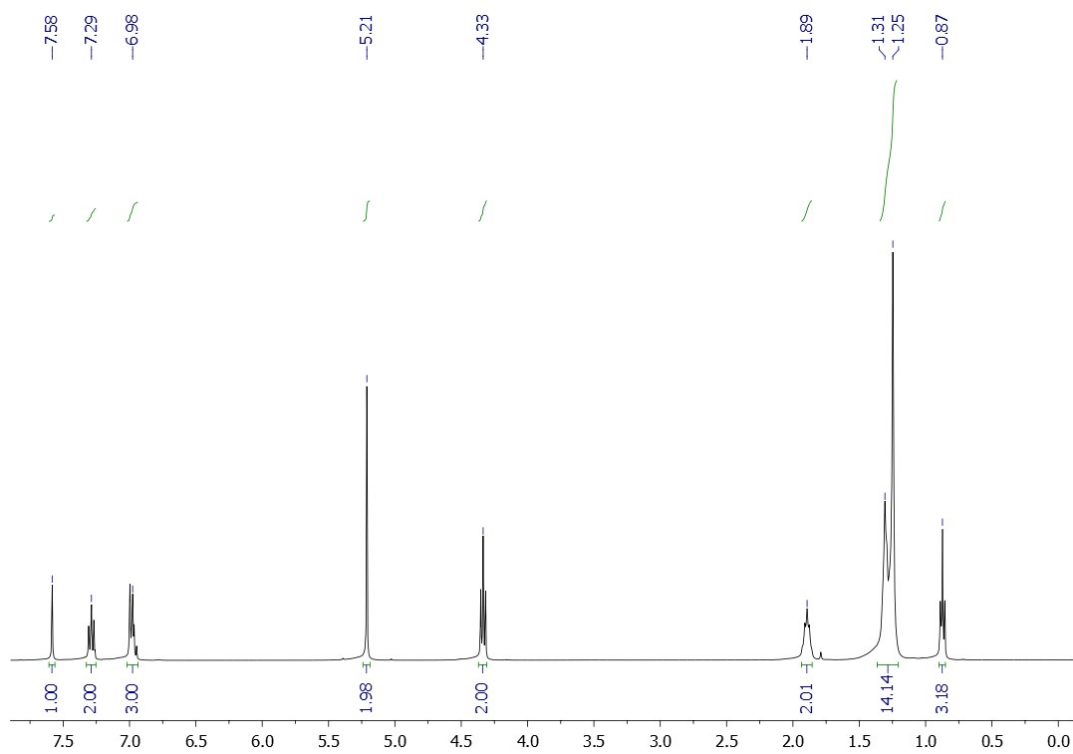

**Figure S3.**  $^1\text{H}$  NMR spectrum of 1-decyl-4-(phoxymethyl)-1,2,3-triazole (1,4-adduct) ( $\text{CDCl}_3\text{-d}_1$ , 25 °C).

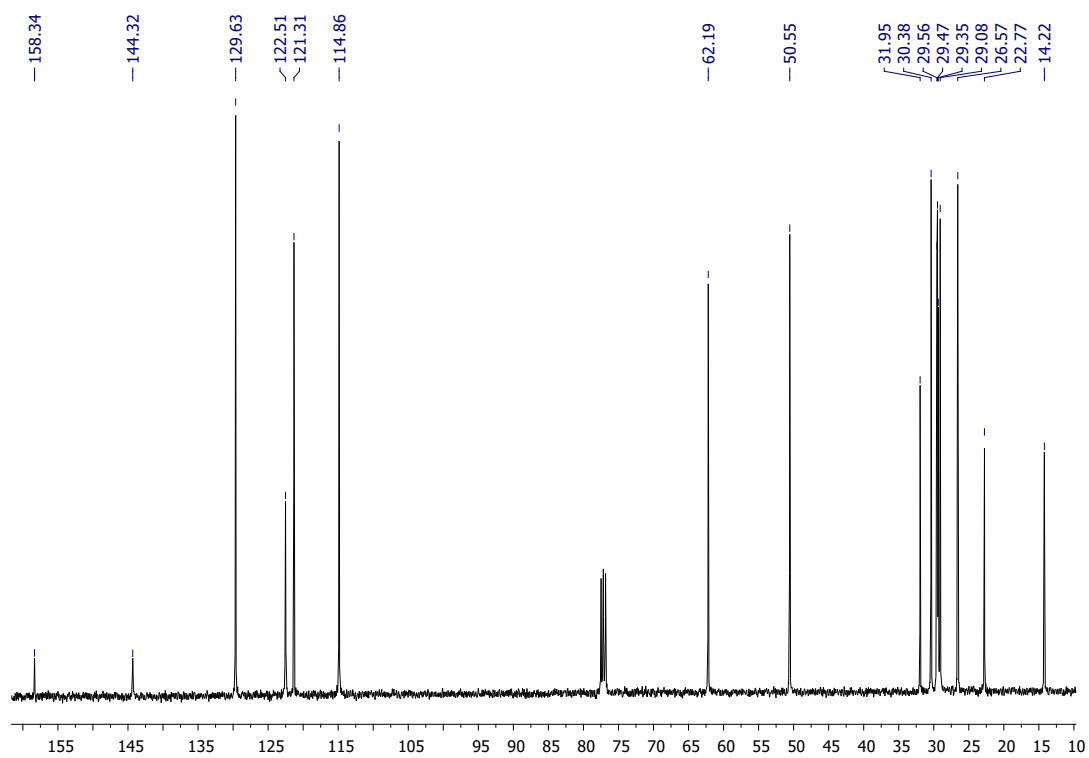

**Figure S4.**  $^{13}\text{C}$  NMR spectrum of compound 1-decyl-4-(phoxymethyl)-1,2,3-triazole (1,4-adduct) ( $\text{CDCl}_3\text{-d}_1$ , 25 °C).

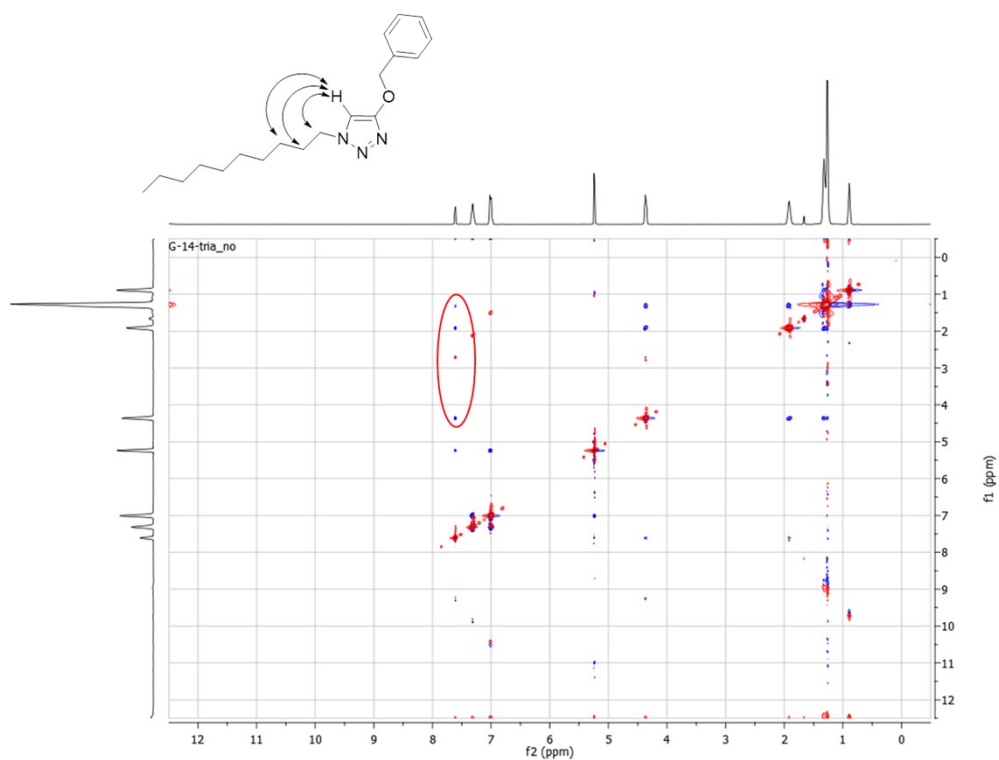

**Figure S5.** NOESY  $^1\text{H}$ - $^1\text{H}$  NMR spectrum of 1-decyl-4-(phenoxymethyl)-1,2,3-triazole (1,4-adduct) ( $\text{CDCl}_3\text{-d}_1$ , 25  $^\circ\text{C}$ ).

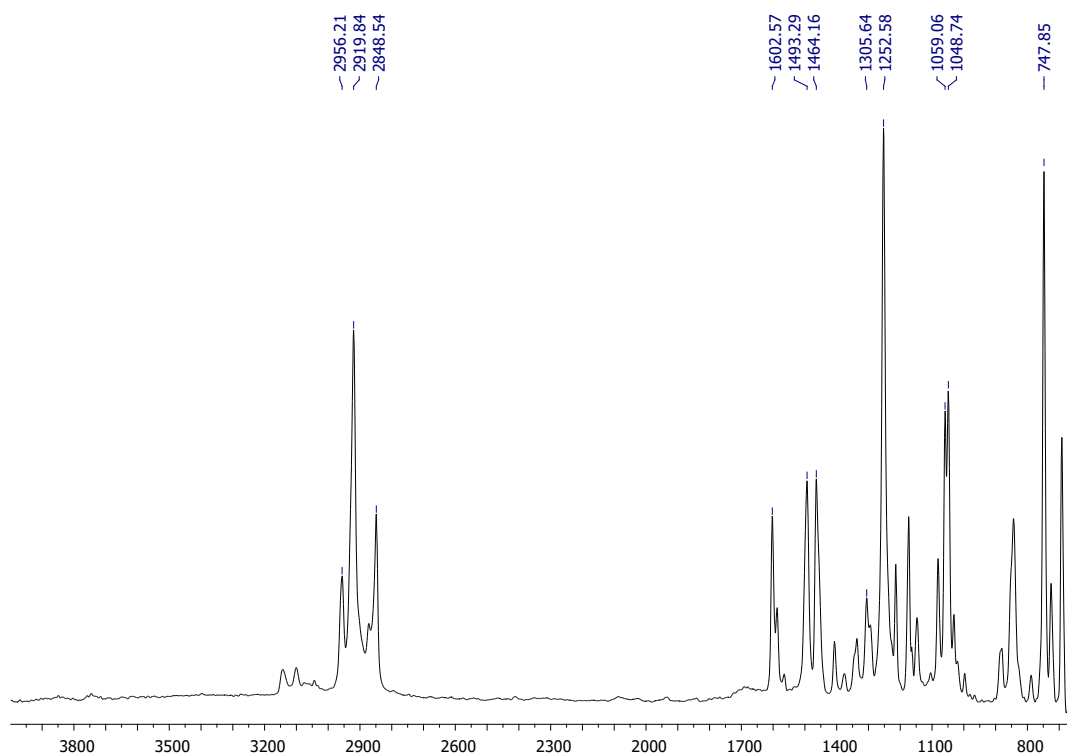

**Figure S6.** FTIR spectrum of 1-decyl-4-(phenoxymethyl)-1,2,3-triazole (1,4-adduct).

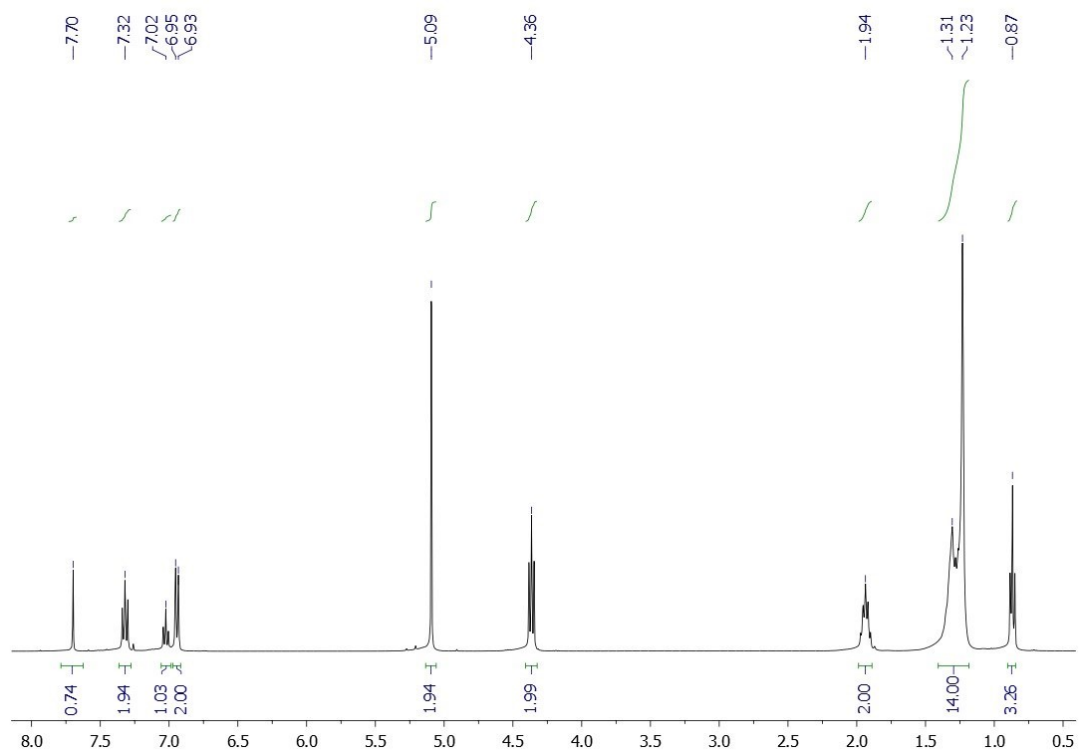

**Figure S7.** NMR  $^1\text{H}$  spectrum of 1-decyl-5-(phenoxyethyl)-1,2,3-triazole (1,5-adduct) ( $\text{CDCl}_3\text{-d}_1$ , 25 °C).

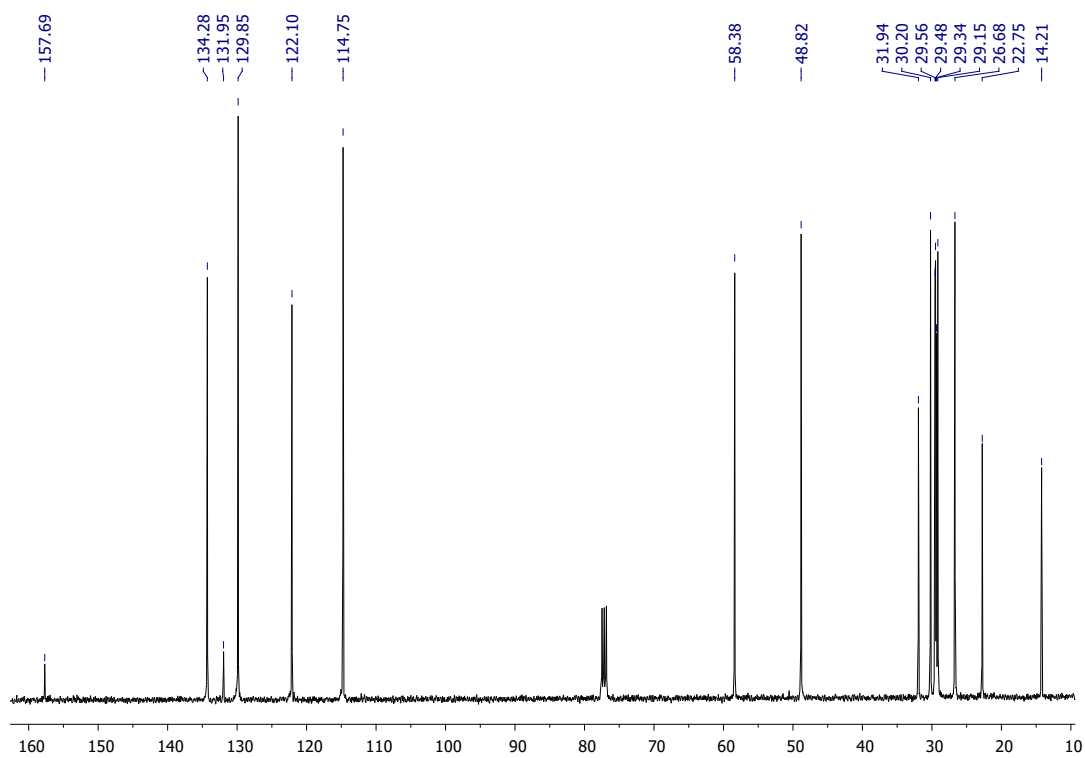

**Figure S8.** NMR  $^{13}\text{C}$  spectrum of 1-decyl-5-(phenoxyethyl)-1,2,3-triazole (1,5-adduct) ( $\text{CDCl}_3\text{-d}_1$ , 25 °C).

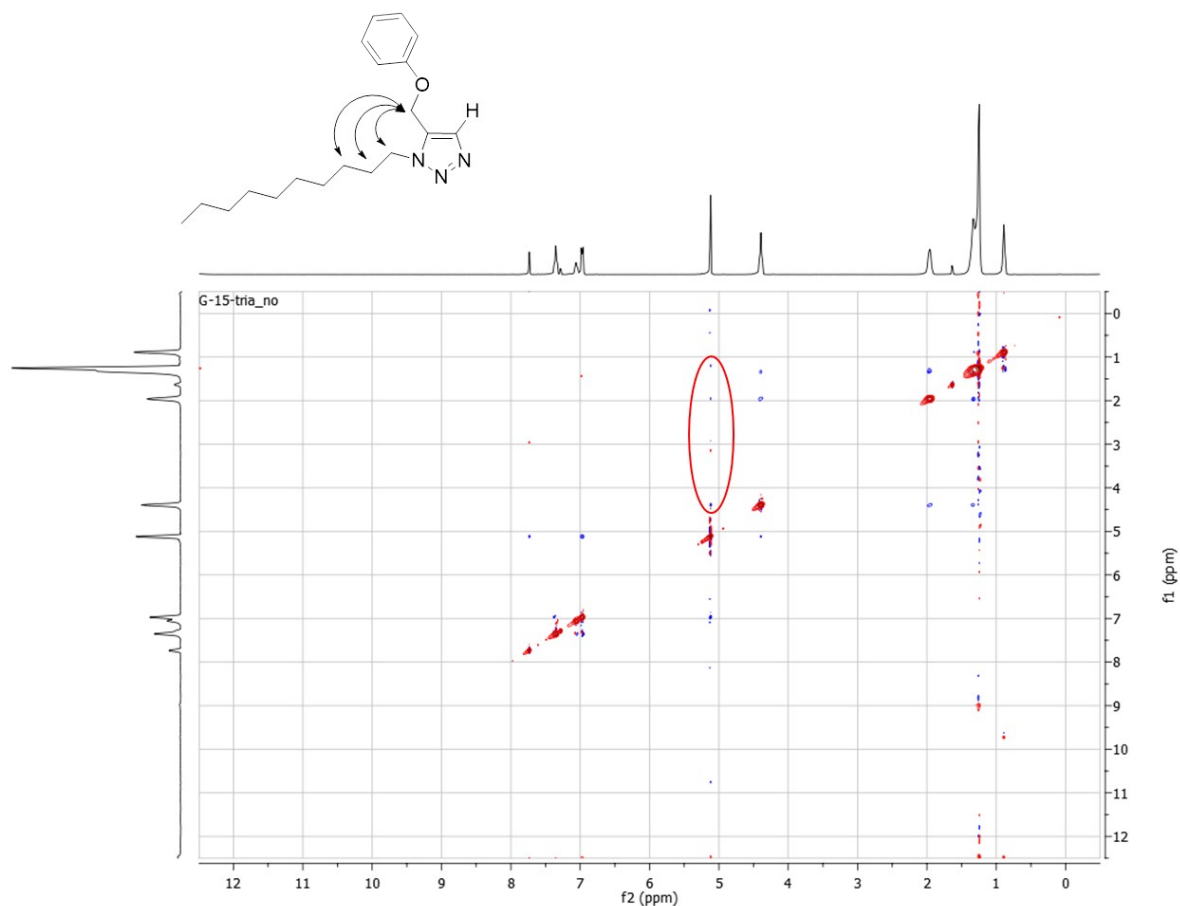

**Figure S9.** NOESY  $^1\text{H}$ - $^1\text{H}$  NMR spectrum of 1-decyl-5-(phenoxymethyl)-1,2,3-triazole (1,5-adduct) ( $\text{CDCl}_3$ - $d_1$ , 25  $^\circ\text{C}$ ).

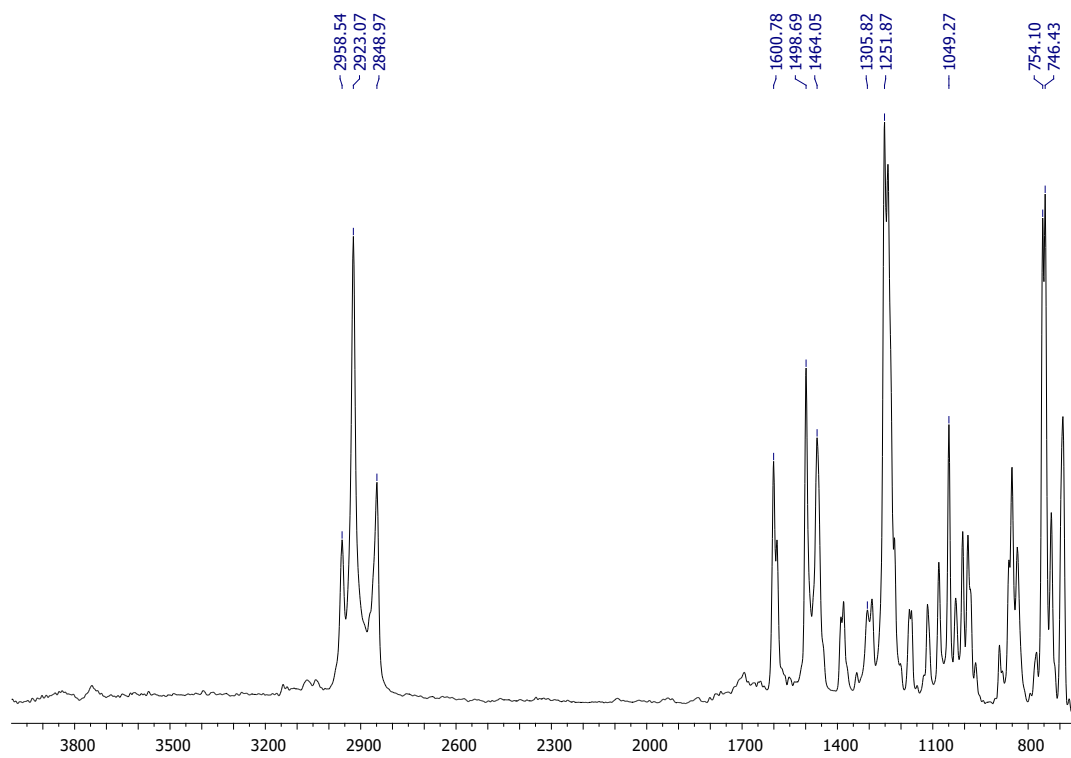

**Figure S10.** FTIR spectrum of 1-decyl-5-(phenoxymethyl)-1,2,3-triazole (1,5-adduct).

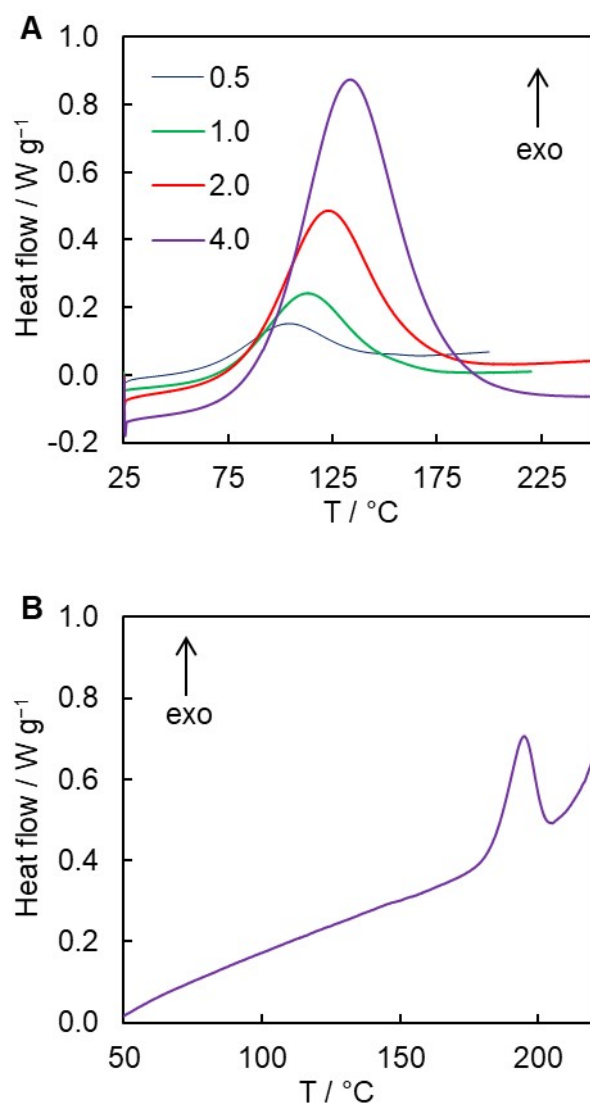

**Figure S11.** Original DSC curves for studied AAC (numbers denote heating rates in °C min<sup>-1</sup>) and *l*-azidodecane decomposition (B) (4 °C min<sup>-1</sup>).



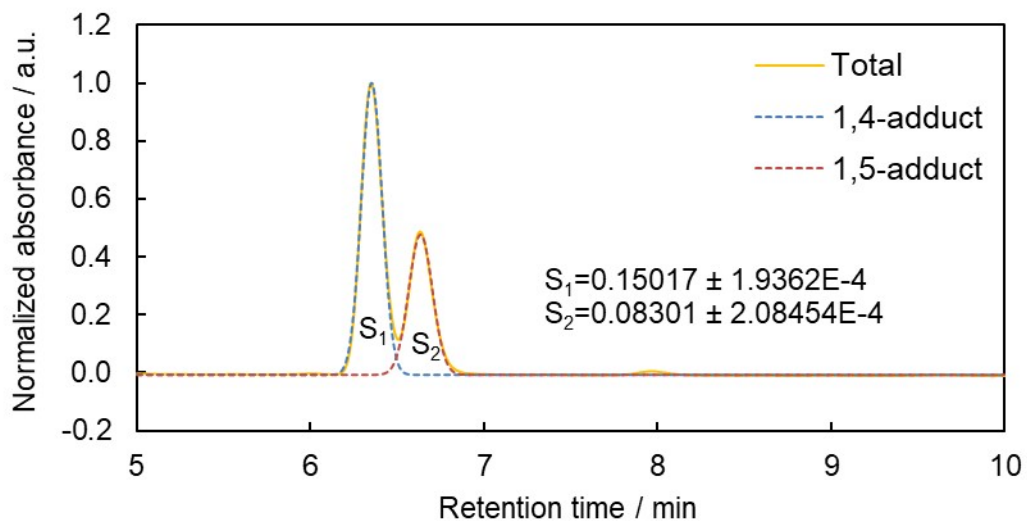

**Figure S12.** Chromatogram of the reaction mixture after DSC experiment at  $0.5 \text{ } ^\circ\text{C min}^{-1}$ .

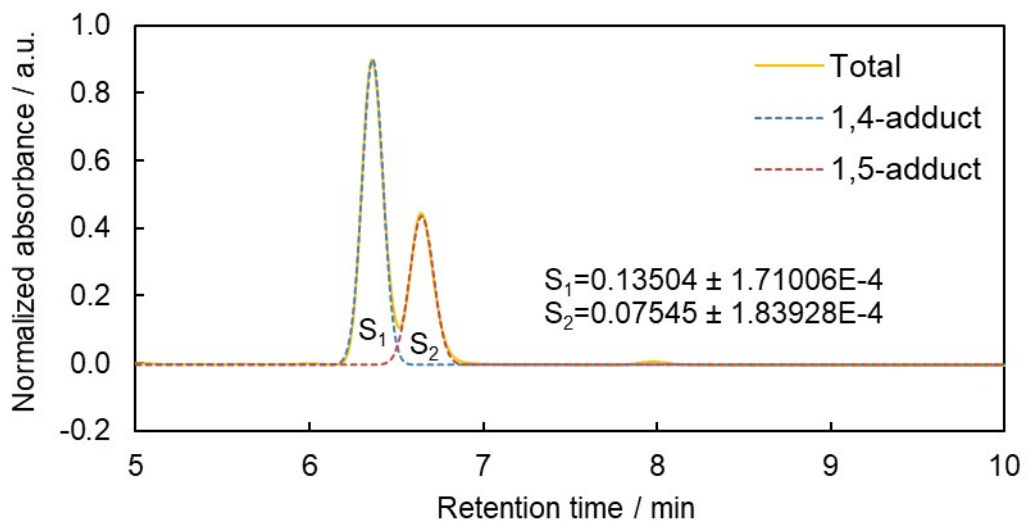

**Figure S13.** Chromatogram of the reaction mixture after DSC experiment at  $1.0 \text{ } ^\circ\text{C min}^{-1}$ .

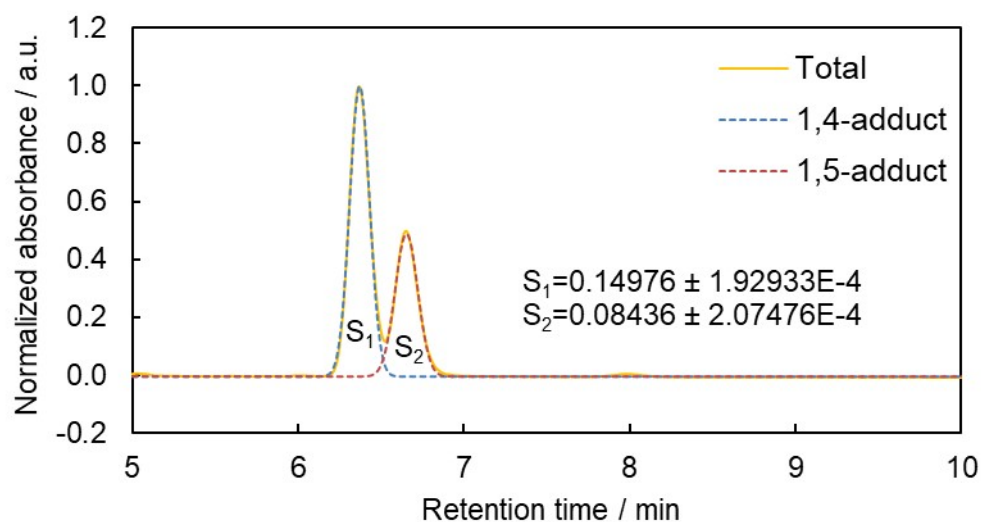

**Figure S14.** Chromatogram of the reaction mixture after DSC experiment at 2.0 °C min<sup>-1</sup>.

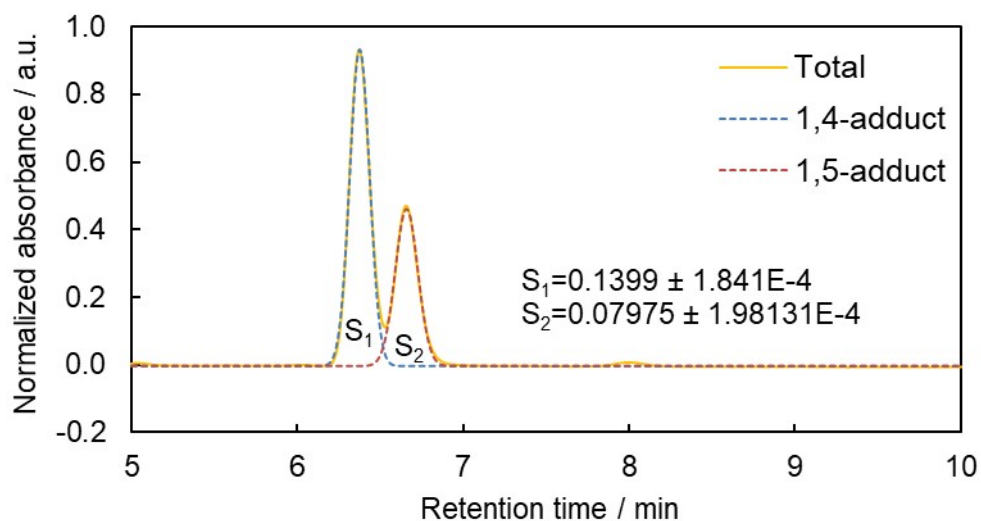

**Figure S15.** Chromatogram of the reaction mixture after DSC experiment at 4.0 °C min<sup>-1</sup>.

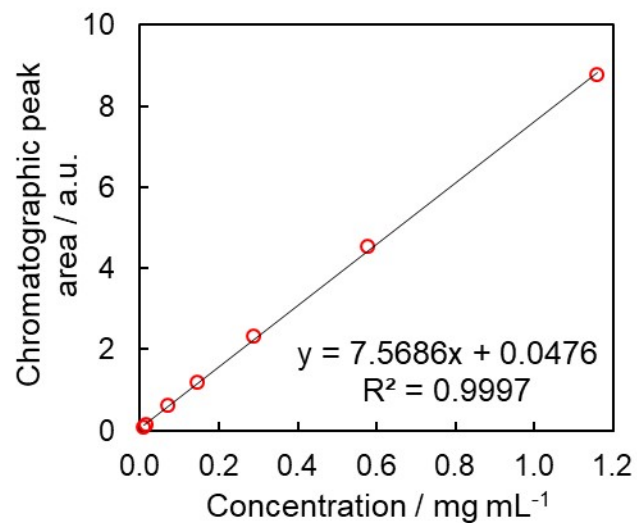

**Figure S16.** Calibration curve for the *1,4*-adduct.

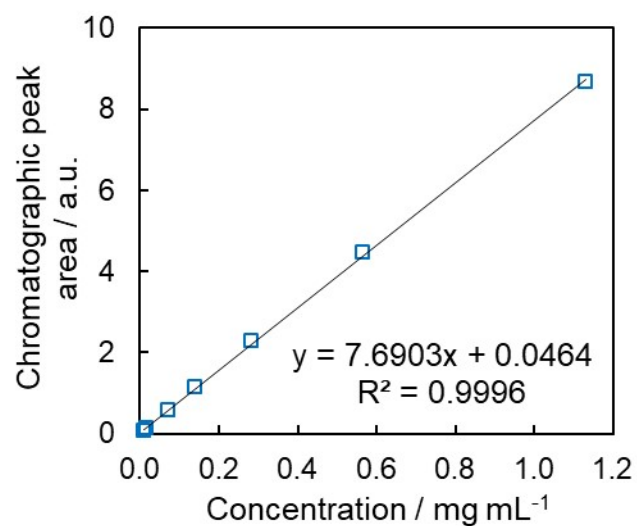

**Figure S17.** Calibration curve for the *1,5*-adduct.
